# Supplementary material for: Vibrationally excited states of HC5P: millimetre-wave spectroscopy and coupled cluster calculationsElectronic supplementary information (ESI) available: Theoretical force constants, measured transition frequencies and least-squares residuals. See http://www.rsc.org/suppdata/cp/b3/b307069g/
Source: Royal Society of Chemistry journal article supplement (doi:10.1039/b307069g), 2003-01-01
Supplement: tables.doc [file tables.doc]

***Supplementary material for the article:***

**Vibrationally excited states of HC5P: millimetre-wave spectroscopy
and coupled cluster calculations**

L. Bizzocchi, C. Degli Esposti, and P. Botschwina

CONTENTS:

- **Tables S1-S3** list the cubic force constants of HC5P as obtained by CCSD(T) with the cc-pVQZ basis set of Dunning and coworkers. The cubic force field is represented in the following form:

  *V*  *Ve* =
  Here, *r*, *R*1, .... and *R*5 describe the changes in the CH, C(1)C(2), .... and C(5)P bond lengths with respect to their equilibrium values. Angles **, **, **, ** and ** describe the deviations from linearity in the order HC(1)C(2), C(1)C(2)C(3), C(2)C(3)C(4), C(3)C(4)C(5), and C(4)C(5)P. Two angles are defined to have the same sign for a cis-like distortion of the nuclear framework.
- **Tables S4-S7** list the measured transition frequencies and the corresponding least-squares residuals for the (000010), (000100), (001000), and (010000) vibrationally excited states of HC5P.
- **Table S8** lists the measured transition frequencies and the corresponding least-squares residuals for the resonance system (000020)  (100000)  (000101) of HC5P.
- **Tables S9-S12** list the measured transition frequencies and the corresponding least-squares residuals for the (000002), (000003), (000011), and (001001) excited bending states of HC5P.

**Table S1:** Quadratic and cubic stretching force constants for HC5P (CCSD(T)/cc-pVQZ)

| Term | | | | | | value (a.u.) | Term | | | | | | value (a.u.) |
| --- | --- | --- | --- | --- | --- | --- | --- | --- | --- | --- | --- | --- | --- |
| i | j | k | l | m | n |  | i | j | k | l | m | n |  |
| 2 | 0 | 0 | 0 | 0 | 0 | 0.204370 | 0 | 0 | 1 | 1 | 0 | 0 | 0.043074 |
| 3 | 0 | 0 | 0 | 0 | 0 | -0.203685 | 0 | 0 | 1 | 2 | 0 | 0 | -0.003601 |
| 0 | 2 | 0 | 0 | 0 | 0 | 0.495001 | 0 | 0 | 2 | 1 | 0 | 0 | -0.047621 |
| 0 | 3 | 0 | 0 | 0 | 0 | -0.514685 | 0 | 0 | 1 | 0 | 1 | 0 | -0.015454 |
| 0 | 0 | 2 | 0 | 0 | 0 | 0.236662 | 0 | 0 | 1 | 0 | 2 | 0 | 0.014086 |
| 0 | 0 | 3 | 0 | 0 | 0 | -0.225093 | 0 | 0 | 2 | 0 | 1 | 0 | 0.015371 |
| 0 | 0 | 0 | 2 | 0 | 0 | 0.463806 | 0 | 0 | 1 | 0 | 0 | 1 | 0.007397 |
| 0 | 0 | 0 | 3 | 0 | 0 | -0.486536 | 0 | 0 | 1 | 0 | 0 | 2 | 0.000787 |
| 0 | 0 | 0 | 0 | 2 | 0 | 0.228451 | 0 | 0 | 2 | 0 | 0 | 1 | -0.007654 |
| 0 | 0 | 0 | 0 | 3 | 0 | -0.225160 | 0 | 0 | 0 | 1 | 1 | 0 | 0.057669 |
| 0 | 0 | 0 | 0 | 0 | 2 | 0.270447 | 0 | 0 | 0 | 1 | 2 | 0 | -0.061409 |
| 0 | 0 | 0 | 0 | 0 | 3 | -0.259149 | 0 | 0 | 0 | 2 | 1 | 0 | 0.001754 |
| 1 | 1 | 0 | 0 | 0 | 0 | -0.006959 | 0 | 0 | 0 | 1 | 0 | 1 | -0.024305 |
| 1 | 2 | 0 | 0 | 0 | 0 | -0.001181 | 0 | 0 | 0 | 1 | 0 | 2 | -0.005366 |
| 2 | 1 | 0 | 0 | 0 | 0 | 0.005113 | 0 | 0 | 0 | 2 | 0 | 1 | -0.008949 |
| 1 | 0 | 1 | 0 | 0 | 0 | -0.000101 | 0 | 0 | 0 | 0 | 1 | 1 | 0.037961 |
| 1 | 0 | 2 | 0 | 0 | 0 | 0.000029 | 0 | 0 | 0 | 0 | 1 | 2 | -0.006238 |
| 2 | 0 | 1 | 0 | 0 | 0 | 0.000117 | 0 | 0 | 0 | 0 | 2 | 1 | -0.043134 |
| 1 | 0 | 0 | 1 | 0 | 0 | -0.000118 | 1 | 1 | 1 | 0 | 0 | 0 | -0.000942 |
| 1 | 0 | 0 | 2 | 0 | 0 | 0.000157 | 1 | 1 | 0 | 1 | 0 | 0 | -0.000137 |
| 2 | 0 | 0 | 1 | 0 | 0 | 0.000046 | 1 | 1 | 0 | 0 | 1 | 0 | 0.000203 |
| 1 | 0 | 0 | 0 | 1 | 0 | 0.000134 | 1 | 1 | 0 | 0 | 0 | 1 | -0.000200 |
| 1 | 0 | 0 | 0 | 2 | 0 | 0.000094 | 1 | 0 | 1 | 1 | 0 | 0 | -0.000181 |
| 2 | 0 | 0 | 0 | 1 | 0 | -0.000020 | 1 | 0 | 1 | 0 | 1 | 0 | 0.000056 |
| 1 | 0 | 0 | 0 | 0 | 1 | -0.000266 | 1 | 0 | 1 | 0 | 0 | 1 | 0.000137 |
| 1 | 0 | 0 | 0 | 0 | 2 | 0.000099 | 1 | 0 | 0 | 1 | 1 | 0 | -0.000129 |
| 2 | 0 | 0 | 0 | 0 | 1 | 0.000031 | 1 | 0 | 0 | 1 | 0 | 1 | -0.000041 |
| 0 | 1 | 1 | 0 | 0 | 0 | 0.048263 | 1 | 0 | 0 | 0 | 1 | 1 | 0.000134 |
| 0 | 1 | 2 | 0 | 0 | 0 | -0.051940 | 0 | 1 | 1 | 1 | 0 | 0 | 0.053969 |
| 0 | 2 | 1 | 0 | 0 | 0 | 0.002032 | 0 | 1 | 1 | 0 | 1 | 0 | -0.019702 |
| 0 | 1 | 0 | 1 | 0 | 0 | -0.023685 | 0 | 1 | 1 | 0 | 0 | 1 | 0.009176 |
| 0 | 1 | 0 | 2 | 0 | 0 | -0.006421 | 0 | 1 | 0 | 1 | 1 | 0 | 0.008110 |
| 0 | 2 | 0 | 1 | 0 | 0 | -0.009279 | 0 | 1 | 0 | 1 | 0 | 1 | -0.005454 |
| 0 | 1 | 0 | 0 | 1 | 0 | 0.009363 | 0 | 1 | 0 | 0 | 1 | 1 | 0.008422 |
| 0 | 1 | 0 | 0 | 2 | 0 | -0.009654 | 0 | 0 | 1 | 1 | 1 | 0 | -0.007378 |
| 0 | 2 | 0 | 0 | 1 | 0 | 0.003554 | 0 | 0 | 1 | 1 | 0 | 1 | 0.006281 |
| 0 | 1 | 0 | 0 | 0 | 1 | -0.003533 | 0 | 0 | 1 | 0 | 1 | 1 | -0.013294 |
| 0 | 1 | 0 | 0 | 0 | 2 | -0.001445 | 0 | 0 | 0 | 1 | 1 | 1 | 0.048221 |
| 0 | 2 | 0 | 0 | 0 | 1 | -0.002405 |  |  |  |  |  |  |  |

**Table S2:** Quadratic bending force constants for HC5P (CCSD(T)/cc-pVQZ)

| Term | | | | | value (a.u.) | Term | | | | | value (a.u.) |
| --- | --- | --- | --- | --- | --- | --- | --- | --- | --- | --- | --- |
| O | p | q | r | s |  | o | p | q | r | s |  |
| 2 | 0 | 0 | 0 | 0 | 0.024949 | 1 | 0 | 0 | 0 | 1 | 0.000221 |
| 0 | 2 | 0 | 0 | 0 | 0.038787 | 0 | 1 | 1 | 0 | 0 | 0.001625 |
| 0 | 0 | 2 | 0 | 0 | 0.034491 | 0 | 1 | 0 | 1 | 0 | -0.003261 |
| 0 | 0 | 0 | 2 | 0 | 0.036538 | 0 | 1 | 0 | 0 | 1 | 0.000238 |
| 0 | 0 | 0 | 0 | 2 | 0.038301 | 0 | 0 | 1 | 1 | 0 | 0.022327 |
| 1 | 1 | 0 | 0 | 0 | 0.022888 | 0 | 0 | 1 | 0 | 1 | -0.003613 |
| 1 | 0 | 1 | 0 | 0 | -0.002682 | 0 | 0 | 0 | 1 | 1 | 0.000279 |
| 1 | 0 | 0 | 1 | 0 | -0.001227 |  |  |  |  |  |  |

**Table S3:** Cubic stretch-bend coupling force constants for HC5P (CCSD(T)/cc-pVQZ)

| Term | | | | | | | | | | | value (a.u.) |
| --- | --- | --- | --- | --- | --- | --- | --- | --- | --- | --- | --- |
| i | j | k | l | m | n | o | p | q | r | s |  |
| 1 | 0 | 0 | 0 | 0 | 0 | 2 | 0 | 0 | 0 | 0 | -0.009270 |
| 1 | 0 | 0 | 0 | 0 | 0 | 0 | 2 | 0 | 0 | 0 | -0.002416 |
| 1 | 0 | 0 | 0 | 0 | 0 | 0 | 0 | 2 | 0 | 0 | 0.000575 |
| 1 | 0 | 0 | 0 | 0 | 0 | 0 | 0 | 0 | 2 | 0 | -0.000330 |
| 1 | 0 | 0 | 0 | 0 | 0 | 0 | 0 | 0 | 0 | 2 | 0.000315 |
| 1 | 0 | 0 | 0 | 0 | 0 | 1 | 1 | 0 | 0 | 0 | 0.000490 |
| 1 | 0 | 0 | 0 | 0 | 0 | 1 | 0 | 1 | 0 | 0 | 0.000200 |
| 1 | 0 | 0 | 0 | 0 | 0 | 1 | 0 | 0 | 1 | 0 | -0.000031 |
| 1 | 0 | 0 | 0 | 0 | 0 | 1 | 0 | 0 | 0 | 1 | 0.000009 |
| 1 | 0 | 0 | 0 | 0 | 0 | 0 | 1 | 1 | 0 | 0 | 0.000183 |
| 1 | 0 | 0 | 0 | 0 | 0 | 0 | 1 | 0 | 1 | 0 | 0.000165 |
| 1 | 0 | 0 | 0 | 0 | 0 | 0 | 1 | 0 | 0 | 1 | -0.000033 |
| 1 | 0 | 0 | 0 | 0 | 0 | 0 | 0 | 1 | 1 | 0 | 0.000129 |
| 1 | 0 | 0 | 0 | 0 | 0 | 0 | 0 | 1 | 0 | 1 | -0.000002 |
| 1 | 0 | 0 | 0 | 0 | 0 | 0 | 0 | 0 | 1 | 1 | 0.000114 |
| 0 | 1 | 0 | 0 | 0 | 0 | 2 | 0 | 0 | 0 | 0 | -0.052370 |
| 0 | 1 | 0 | 0 | 0 | 0 | 0 | 2 | 0 | 0 | 0 | -0.049957 |
| 0 | 1 | 0 | 0 | 0 | 0 | 0 | 0 | 2 | 0 | 0 | 0.002005 |
| 0 | 1 | 0 | 0 | 0 | 0 | 0 | 0 | 0 | 2 | 0 | -0.002873 |
| 0 | 1 | 0 | 0 | 0 | 0 | 0 | 0 | 0 | 0 | 2 | -0.000905 |
| 0 | 1 | 0 | 0 | 0 | 0 | 1 | 1 | 0 | 0 | 0 | 0.032691 |
| 0 | 1 | 0 | 0 | 0 | 0 | 1 | 0 | 1 | 0 | 0 | -0.003480 |
| 0 | 1 | 0 | 0 | 0 | 0 | 1 | 0 | 0 | 1 | 0 | -0.001989 |
| 0 | 1 | 0 | 0 | 0 | 0 | 1 | 0 | 0 | 0 | 1 | 0.000264 |
| 0 | 1 | 0 | 0 | 0 | 0 | 0 | 1 | 1 | 0 | 0 | 0.014854 |
| 0 | 1 | 0 | 0 | 0 | 0 | 0 | 1 | 0 | 1 | 0 | 0.003781 |
| 0 | 1 | 0 | 0 | 0 | 0 | 0 | 1 | 0 | 0 | 1 | -0.000612 |
| 0 | 1 | 0 | 0 | 0 | 0 | 0 | 0 | 1 | 1 | 0 | -0.002215 |
| 0 | 1 | 0 | 0 | 0 | 0 | 0 | 0 | 1 | 0 | 1 | -0.000120 |
| 0 | 1 | 0 | 0 | 0 | 0 | 0 | 0 | 0 | 1 | 1 | 0.001112 |
| 0 | 0 | 1 | 0 | 0 | 0 | 2 | 0 | 0 | 0 | 0 | 0.005147 |
| 0 | 0 | 1 | 0 | 0 | 0 | 0 | 2 | 0 | 0 | 0 | -0.030637 |
| 0 | 0 | 1 | 0 | 0 | 0 | 0 | 0 | 2 | 0 | 0 | -0.031778 |
| 0 | 0 | 1 | 0 | 0 | 0 | 0 | 0 | 0 | 2 | 0 | 0.004117 |
| 0 | 0 | 1 | 0 | 0 | 0 | 0 | 0 | 0 | 0 | 2 | -0.001098 |
| 0 | 0 | 1 | 0 | 0 | 0 | 1 | 1 | 0 | 0 | 0 | 0.004815 |
| 0 | 0 | 1 | 0 | 0 | 0 | 1 | 0 | 1 | 0 | 0 | 0.000452 |
| 0 | 0 | 1 | 0 | 0 | 0 | 1 | 0 | 0 | 1 | 0 | -0.000164 |
| 0 | 0 | 1 | 0 | 0 | 0 | 1 | 0 | 0 | 0 | 1 | 0.000102 |
| 0 | 0 | 1 | 0 | 0 | 0 | 0 | 1 | 1 | 0 | 0 | -0.001454 |
| 0 | 0 | 1 | 0 | 0 | 0 | 0 | 1 | 0 | 1 | 0 | 0.000292 |
| 0 | 0 | 1 | 0 | 0 | 0 | 0 | 1 | 0 | 0 | 1 | -0.000000 |
| 0 | 0 | 1 | 0 | 0 | 0 | 0 | 0 | 1 | 1 | 0 | 0.007037 |
| 0 | 0 | 1 | 0 | 0 | 0 | 0 | 0 | 1 | 0 | 1 | 0.000718 |
| 0 | 0 | 1 | 0 | 0 | 0 | 0 | 0 | 0 | 1 | 1 | -0.001289 |
|  |  |  |  |  |  |  |  |  |  |  |  |

**Table S3 (continued)**

| Term | | | | | | | | | | | value (a.u.) |
| --- | --- | --- | --- | --- | --- | --- | --- | --- | --- | --- | --- |
| i | j | k | l | m | n | o | p | q | r | s |  |
| 0 | 0 | 0 | 1 | 0 | 0 | 2 | 0 | 0 | 0 | 0 | -0.003659 |
| 0 | 0 | 0 | 1 | 0 | 0 | 0 | 2 | 0 | 0 | 0 | 0.002801 |
| 0 | 0 | 0 | 1 | 0 | 0 | 0 | 0 | 2 | 0 | 0 | -0.055192 |
| 0 | 0 | 0 | 1 | 0 | 0 | 0 | 0 | 0 | 2 | 0 | -0.049434 |
| 0 | 0 | 0 | 1 | 0 | 0 | 0 | 0 | 0 | 0 | 2 | -0.000368 |
| 0 | 0 | 0 | 1 | 0 | 0 | 1 | 1 | 0 | 0 | 0 | -0.001936 |
| 0 | 0 | 0 | 1 | 0 | 0 | 1 | 0 | 1 | 0 | 0 | 0.004755 |
| 0 | 0 | 0 | 1 | 0 | 0 | 1 | 0 | 0 | 1 | 0 | -0.001911 |
| 0 | 0 | 0 | 1 | 0 | 0 | 1 | 0 | 0 | 0 | 1 | 0.000284 |
| 0 | 0 | 0 | 1 | 0 | 0 | 0 | 1 | 1 | 0 | 0 | 0.016118 |
| 0 | 0 | 0 | 1 | 0 | 0 | 0 | 1 | 0 | 1 | 0 | -0.004328 |
| 0 | 0 | 0 | 1 | 0 | 0 | 0 | 1 | 0 | 0 | 1 | 0.000606 |
| 0 | 0 | 0 | 1 | 0 | 0 | 0 | 0 | 1 | 1 | 0 | 0.032324 |
| 0 | 0 | 0 | 1 | 0 | 0 | 0 | 0 | 1 | 0 | 1 | -0.002922 |
| 0 | 0 | 0 | 1 | 0 | 0 | 0 | 0 | 0 | 1 | 1 | 0.015503 |
| 0 | 0 | 0 | 0 | 1 | 0 | 2 | 0 | 0 | 0 | 0 | 0.001219 |
| 0 | 0 | 0 | 0 | 1 | 0 | 0 | 2 | 0 | 0 | 0 | -0.001121 |
| 0 | 0 | 0 | 0 | 1 | 0 | 0 | 0 | 2 | 0 | 0 | 0.007713 |
| 0 | 0 | 0 | 0 | 1 | 0 | 0 | 0 | 0 | 2 | 0 | -0.033845 |
| 0 | 0 | 0 | 0 | 1 | 0 | 0 | 0 | 0 | 0 | 2 | -0.023864 |
| 0 | 0 | 0 | 0 | 1 | 0 | 1 | 1 | 0 | 0 | 0 | 0.000557 |
| 0 | 0 | 0 | 0 | 1 | 0 | 1 | 0 | 1 | 0 | 0 | -0.000699 |
| 0 | 0 | 0 | 0 | 1 | 0 | 1 | 0 | 0 | 1 | 0 | -0.000136 |
| 0 | 0 | 0 | 0 | 1 | 0 | 1 | 0 | 0 | 0 | 1 | -0.000014 |
| 0 | 0 | 0 | 0 | 1 | 0 | 0 | 0 | 1 | 1 | 0 | -0.002513 |
| 0 | 0 | 0 | 0 | 1 | 0 | 0 | 1 | 0 | 1 | 0 | 0.000999 |
| 0 | 0 | 0 | 0 | 1 | 0 | 0 | 1 | 0 | 0 | 1 | 0.000117 |
| 0 | 0 | 0 | 0 | 1 | 0 | 0 | 0 | 1 | 1 | 0 | 0.007625 |
| 0 | 0 | 0 | 0 | 1 | 0 | 0 | 0 | 1 | 0 | 1 | -0.000032 |
| 0 | 0 | 0 | 0 | 1 | 0 | 0 | 0 | 0 | 1 | 1 | -0.002443 |
| 0 | 0 | 0 | 0 | 0 | 1 | 2 | 0 | 0 | 0 | 0 | 0.000022 |
| 0 | 0 | 0 | 0 | 0 | 1 | 0 | 2 | 0 | 0 | 0 | -0.001049 |
| 0 | 0 | 0 | 0 | 0 | 1 | 0 | 0 | 2 | 0 | 0 | -0.002714 |
| 0 | 0 | 0 | 0 | 0 | 1 | 0 | 0 | 0 | 2 | 0 | -0.000491 |
| 0 | 0 | 0 | 0 | 0 | 1 | 0 | 0 | 0 | 0 | 2 | -0.037997 |
| 0 | 0 | 0 | 0 | 0 | 1 | 1 | 1 | 0 | 0 | 0 | -0.000597 |
| 0 | 0 | 0 | 0 | 0 | 1 | 1 | 0 | 1 | 0 | 0 | 0.000451 |
| 0 | 0 | 0 | 0 | 0 | 1 | 1 | 0 | 0 | 1 | 0 | 0.000071 |
| 0 | 0 | 0 | 0 | 0 | 1 | 1 | 0 | 0 | 0 | 1 | -0.000166 |
| 0 | 0 | 0 | 0 | 0 | 1 | 0 | 1 | 1 | 0 | 0 | 0.001024 |
| 0 | 0 | 0 | 0 | 0 | 1 | 0 | 1 | 0 | 1 | 0 | -0.000003 |
| 0 | 0 | 0 | 0 | 0 | 1 | 0 | 1 | 0 | 0 | 1 | -0.000477 |
| 0 | 0 | 0 | 0 | 0 | 1 | 0 | 0 | 1 | 1 | 0 | -0.003165 |
| 0 | 0 | 0 | 0 | 0 | 1 | 0 | 0 | 1 | 0 | 1 | 0.003192 |
| 0 | 0 | 0 | 0 | 0 | 1 | 0 | 0 | 0 | 1 | 1 | 0.009883 |
|  |  |  |  |  |  |  |  |  |  |  |  |

**Table S4:** Experimental frequencies and least-squares residuals (MHz) for the vibrational state (000010) of HC5P.

|  |  |  |  |  |
| --- | --- | --- | --- | --- |
| no. | J | *l*10 | observed frequency | obs.  calc |
|  |  |  |  |  |
|  |  |  |  |  |
| 1 | 44 |  | 78818.945 | 0.003 |
| 2 | 48 |  | 85824.136 | 0.006 |
| 3 | 49 |  | 87575.389 | -0.001 |
| 4 | 50 |  | 89326.638 | 0.003 |
| 5 | 54 |  | 96331.458 | 0.002 |
| 6 | 57 |  | 101584.896 | 0.000 |
| 7 | 60 |  | 106838.169 | -0.007 |
| 8 | 62 |  | 110340.282 | 0.012 |
| 9 | 65 |  | 115593.271 | 0.006 |
| 10 | 73 |  | 129600.328 | -0.014 |
| 11 | 76 |  | 134852.623 | -0.007 |
| 12 | 84 |  | 148857.668 | -0.005 |
| 13 | 98 |  | 173362.397 | 0.001 |
| 14 | 105 |  | 185612.588 | 0.005 |
| 15 | 44 |  | 78840.077 | -0.003 |
| 16 | 48 |  | 85847.137 | -0.006 |
| 17 | 49 |  | 87598.884 | 0.012 |
| 18 | 50 |  | 89350.589 | 0.004 |
| 19 | 54 |  | 96357.281 | 0.001 |
| 20 | 57 |  | 101612.116 | -0.008 |
| 21 | 60 |  | 106866.820 | 0.012 |
| 22 | 62 |  | 110369.833 | -0.004 |
| 23 | 65 |  | 115624.235 | 0.000 |
| 24 | 73 |  | 129635.042 | -0.006 |
| 25 | 76 |  | 134888.741 | 0.005 |
| 26 | 84 |  | 148897.494 | -0.012 |
| 27 | 98 |  | 173408.738 | 0.002 |
| 28 | 105 |  | 185662.171 | 0.004 |
|  |  |  |  |  |

**Table S5:** Experimental frequencies and least-squares residuals (MHz) for the vibrational state (000100) of HC5P.

|  |  |  |  |  |
| --- | --- | --- | --- | --- |
| no. | J | *l*9 | observed frequency | obs.  calc |
|  |  |  |  |  |
|  |  |  |  |  |
| 1 | 44 |  | 78784.270 | 0.000 |
| 2 | 48 |  | 85786.377 | -0.006 |
| 3 | 49 |  | 87536.882 | 0.007 |
| 4 | 50 |  | 89287.346 | -0.006 |
| 5 | 53 |  | 94538.690 | 0.002 |
| 6 | 54 |  | 96289.099 | -0.001 |
| 7 | 57 |  | 101540.239 | 0.001 |
| 8 | 60 |  | 106791.209 | -0.007 |
| 9 | 62 |  | 110291.799 | 0.022 |
| 10 | 65 |  | 115542.466 | -0.007 |
| 11 | 73 |  | 129543.421 | -0.003 |
| 12 | 76 |  | 134793.415 | -0.004 |
| 13 | 84 |  | 148792.357 | 0.005 |
| 14 | 98 |  | 173286.402 | -0.013 |
| 15 | 105 |  | 185531.296 | 0.009 |
| 16 | 44 |  | 78797.829 | 0.001 |
| 17 | 48 |  | 85801.140 | -0.005 |
| 18 | 49 |  | 87551.942 | 0.004 |
| 19 | 50 |  | 89302.714 | -0.002 |
| 20 | 53 |  | 94554.945 | -0.009 |
| 21 | 54 |  | 96305.672 | 0.004 |
| 22 | 57 |  | 101557.715 | 0.007 |
| 23 | 60 |  | 106809.588 | 0.000 |
| 24 | 62 |  | 110310.736 | -0.014 |
| 25 | 65 |  | 115562.349 | 0.001 |
| 26 | 73 |  | 129565.708 | 0.005 |
| 27 | 76 |  | 134816.616 | 0.017 |
| 28 | 84 |  | 148817.924 | -0.009 |
| 29 | 98 |  | 173316.194 | 0.002 |
| 30 | 105 |  | 185563.158 | -0.003 |
|  |  |  |  |  |

**Table S6:** Experimental frequencies and least-squares residuals (MHz) for the vibrational state (001000) of HC5P.

|  |  |  |  |  |
| --- | --- | --- | --- | --- |
| no. | J | *l*8 | observed frequency | obs.  calc |
|  |  |  |  |  |
|  |  |  |  |  |
| 1 | 44 |  | 78789.706 | 0.005 |
| 2 | 48 |  | 85792.279 | -0.018 |
| 3 | 49 |  | 87542.933 | 0.023 |
| 4 | 50 |  | 89293.513 | 0.005 |
| 5 | 53 |  | 94545.207 | 0.001 |
| 6 | 54 |  | 96295.751 | 0.011 |
| 7 | 57 |  | 101547.239 | -0.001 |
| 8 | 60 |  | 106798.576 | -0.005 |
| 9 | 62 |  | 110299.385 | 0.001 |
| 10 | 65 |  | 115550.439 | -0.004 |
| 11 | 73 |  | 129552.385 | 0.022 |
| 12 | 76 |  | 134802.706 | -0.015 |
| 13 | 84 |  | 148802.598 | -0.025 |
| 14 | 98 |  | 173298.366 | -0.020 |
| 15 | 105 |  | 185544.135 | 0.026 |
| 16 | 44 |  | 78802.932 | -0.004 |
| 17 | 48 |  | 85806.711 | 0.003 |
| 18 | 49 |  | 87557.602 | -0.012 |
| 19 | 50 |  | 89308.504 | -0.002 |
| 20 | 53 |  | 94561.079 | -0.006 |
| 21 | 54 |  | 96311.920 | 0.007 |
| 22 | 57 |  | 101564.294 | 0.000 |
| 23 | 60 |  | 106816.537 | 0.021 |
| 24 | 62 |  | 110317.894 | -0.011 |
| 25 | 65 |  | 115569.844 | -0.001 |
| 26 | 73 |  | 129574.107 | -0.005 |
| 27 | 76 |  | 134825.355 | 0.006 |
| 28 | 84 |  | 148827.598 | 0.002 |
| 29 | 98 |  | 173327.458 | 0.002 |
| 30 | 105 |  | 185575.222 | -0.004 |
|  |  |  |  |  |

**Table S7:** Experimental frequencies and least-squares residuals (MHz) for the vibrational state (010000) of HC5P.

|  |  |  |  |  |
| --- | --- | --- | --- | --- |
| no. | J | *l*7 | observed frequency | obs.  calc |
|  |  |  |  |  |
|  |  |  |  |  |
| 1 | 44 |  | 78713.782 | 0.013 |
| 2 | 48 |  | 85709.630 | 0.004 |
| 3 | 49 |  | 87458.547 | -0.007 |
| 4 | 50 |  | 89207.475 | 0.007 |
| 5 | 51 |  | 90956.361 | -0.004 |
| 6 | 52 |  | 92705.269 | 0.021 |
| 7 | 53 |  | 94454.111 | -0.003 |
| 8 | 54 |  | 96202.966 | 0.002 |
| 9 | 57 |  | 101449.416 | 0.001 |
| 10 | 60 |  | 106695.683 | -0.025 |
| 11 | 62 |  | 110193.133 | -0.013 |
| 12 | 65 |  | 115439.164 | 0.004 |
| 13 | 73 |  | 129427.635 | -0.003 |
| 14 | 84 |  | 148659.436 | -0.004 |
| 15 | 94 |  | 166140.266 | 0.039 |
| 16 | 97 |  | 171383.902 | -0.019 |
| 17 | 98 |  | 173131.751 | -0.009 |
| 18 | 44 |  | 78722.651 | 0.001 |
| 19 | 48 |  | 85719.297 | -0.001 |
| 20 | 49 |  | 87468.411 | -0.013 |
| 21 | 50 |  | 89217.541 | 0.006 |
| 22 | 51 |  | 90966.622 | -0.009 |
| 23 | 52 |  | 92715.714 | 0.003 |
| 24 | 53 |  | 94464.797 | 0.022 |
| 25 | 54 |  | 96213.815 | -0.008 |
| 26 | 57 |  | 101460.859 | -0.008 |
| 27 | 60 |  | 106707.744 | -0.010 |
| 28 | 62 |  | 110205.601 | 0.013 |
| 29 | 65 |  | 115452.208 | 0.011 |
| 30 | 73 |  | 129442.238 | -0.022 |
| 31 | 76 |  | 134688.206 | 0.030 |
| 32 | 84 |  | 148676.224 | -0.022 |
| 33 | 94 |  | 166159.029 | 0.007 |
|  |  |  |  |  |

**Table S8:** Experimental frequencies and least-squares residuals (MHz) for the resonance system (000020)  (100000)  (000101) of HC5P.

(000020) state

|  |  |  |  |  |
| --- | --- | --- | --- | --- |
| no. | J | *l*10 | observed frequency | obs.  calc |
|  |  |  |  |  |
|  |  |  |  |  |
| 1 | 44 |  | 78884.486 | -0.010 |
| 2 | 48 |  | 85895.386 | -0.018 |
| 3 | 49 |  | 87648.113 | 0.023 |
| 4 | 50 |  | 89400.757 | -0.002 |
| 5 | 51 |  | 91153.410 | -0.001 |
| 6 | 52 |  | 92906.038 | -0.007 |
| 7 | 54 |  | 96411.262 | 0.004 |
| 8 | 57 |  | 101668.937 | 0.001 |
| 9 | 60 |  | 106926.441 | 0.005 |
| 10 | 62 |  | 110431.328 | -0.004 |
| 11 | 65 |  | 115688.516 | 0.001 |
| 12 | 73 |  | 129706.660 | 0.007 |
| 13 | 76 |  | 134963.045 | -0.002 |
| 14 | 84 |  | 148978.915 | -0.001 |
| 15 | 97 |  | 171750.671 | 0.008 |
| 16 | 98 |  | 173502.113 | 0.002 |
| 17 | 105 |  | 185761.272 | -0.009 |
| 18 | 44 |  | 78957.529 | 0.010 |
| 19 | 48 |  | 85975.010 | 0.001 |
| 20 | 49 |  | 87729.341 | -0.003 |
| 21 | 50 |  | 89483.650 | -0.013 |
| 22 | 54 |  | 96500.780 | 0.002 |
| 23 | 57 |  | 101763.441 | 0.006 |
| 24 | 60 |  | 107025.918 | -0.012 |
| 25 | 62 |  | 110534.180 | 0.014 |
| 26 | 65 |  | 115796.368 | -0.002 |
| 27 | 73 |  | 129827.973 | -0.016 |
| 28 | 76 |  | 135089.486 | 0.012 |
| 29 | 84 |  | 149119.013 | -0.008 |
| 30 | 94 |  | 166653.419 | -0.005 |
| 31 | 96 |  | 170160.002 | 0.025 |
| 32 | 97 |  | 171913.183 | -0.025 |
| 33 | 98 |  | 173666.422 | 0.014 |
| 34 | 99 |  | 175419.581 | 0.003 |
| 35 | 105 |  | 185937.927 | 0.000 |
| 36 | 106 |  | 187690.864 | -0.007 |
| 37 | 94 |  | 166653.684 | 0.007 |
| 38 | 96 |  | 170160.266 | 0.020 |
| 39 | 97 |  | 171913.472 | -0.013 |
|  |  |  |  |  |

**Table S8 *continued***

(000020) state

|  |  |  |  |  |
| --- | --- | --- | --- | --- |
| no. | J | *l*10 | observed frequency | obs.  calc |
|  |  |  |  |  |
|  |  |  |  |  |
| 40 | 99 |  | 175419.857 | -0.014 |
| 41 | 105 |  | 185938.281 | 0.007 |
| 42 | 106 |  | 187691.224 | -0.003 |
|  |  |  |  |  |

(100000) state

|  |  |  |  |  |
| --- | --- | --- | --- | --- |
| no. | J |  | observed frequency | obs.  calc |
|  |  |  |  |  |
|  |  |  |  |  |
| 1 | 44 |  | 78734.366 | 0.000 |
| 2 | 48 |  | 85732.061 | 0.007 |
| 3 | 49 |  | 87481.436 | -0.005 |
| 4 | 50 |  | 89230.815 | 0.003 |
| 5 | 51 |  | 90980.168 | 0.000 |
| 6 | 54 |  | 96228.137 | -0.006 |
| 7 | 57 |  | 101475.957 | -0.012 |
| 8 | 60 |  | 106723.645 | 0.004 |
| 9 | 62 |  | 110222.007 | 0.009 |
| 10 | 65 |  | 115469.403 | 0.009 |
| 11 | 73 |  | 129461.570 | 0.004 |
| 12 | 76 |  | 134708.259 | -0.018 |
| 13 | 90 |  | 159190.114 | 0.005 |
| 14 | 91 |  | 160938.626 | 0.005 |
| 15 | 92 |  | 162687.101 | -0.005 |
| 16 | 93 |  | 164435.570 | 0.007 |
| 17 | 94 |  | 166183.988 | -0.005 |
| 18 | 95 |  | 167932.408 | 0.012 |
| 19 | 97 |  | 171429.096 | -0.021 |
| 20 | 99 |  | 174925.731 | 0.008 |
|  |  |  |  |  |

(000101) state

|  |  |  |  |  |
| --- | --- | --- | --- | --- |
| no. | J | *k* | observed frequency | obs.  calc |
|  |  |  |  |  |
|  |  |  |  |  |
| 1 | 44 |  | 78920.622 | -0.005 |
| 2 | 46 |  | 82426.325 | 0.000 |
| 3 | 48 |  | 85931.893 | -0.002 |
| 4 | 50 |  | 89437.361 | 0.007 |
| 5 | 51 |  | 91190.049 | 0.003 |
| 6 | 52 |  | 92942.720 | 0.005 |
|  |  |  |  |  |

**Table S8 *continued***

(000101) state

|  |  |  |  |  |
| --- | --- | --- | --- | --- |
| no. | J | *k* | observed frequency | obs.  calc |
|  |  |  |  |  |
|  |  |  |  |  |
| 7 | 53 |  | 94695.340 | -0.024 |
| 8 | 54 |  | 96447.995 | 0.002 |
| 9 | 57 |  | 101705.779 | 0.000 |
| 10 | 60 |  | 106963.443 | 0.011 |
| 11 | 62 |  | 110468.479 | 0.008 |
| 12 | 65 |  | 115725.945 | 0.004 |
| 13 | 71 |  | 126240.577 | 0.003 |
| 14 | 73 |  | 129745.357 | 0.003 |
| 15 | 75 |  | 133250.060 | -0.021 |
| 16 | 77 |  | 136754.749 | -0.002 |
| 17 | 82 |  | 145516.157 | 0.010 |
| 18 | 84 |  | 149020.576 | -0.007 |
| 19 | 93 |  | 164789.537 | 0.002 |
| 20 | 96 |  | 170045.443 | 0.003 |
| 21 | 44 |  | 78928.825 | -0.003 |
| 22 | 46 |  | 82435.636 | 0.003 |
| 23 | 48 |  | 85942.374 | 0.016 |
| 24 | 50 |  | 89449.009 | 0.002 |
| 25 | 51 |  | 91202.311 | 0.007 |
| 26 | 52 |  | 92955.592 | 0.008 |
| 27 | 53 |  | 94708.841 | -0.007 |
| 28 | 54 |  | 96462.077 | -0.017 |
| 29 | 60 |  | 106981.240 | 0.006 |
| 30 | 62 |  | 110487.476 | -0.010 |
| 31 | 65 |  | 115746.743 | 0.002 |
| 32 | 71 |  | 126264.804 | 0.015 |
| 33 | 73 |  | 129770.643 | -0.015 |
| 34 | 75 |  | 133276.446 | -0.004 |
| 35 | 77 |  | 136782.151 | -0.009 |
| 36 | 82 |  | 145546.059 | 0.001 |
| 37 | 84 |  | 149051.448 | -0.011 |
| 38 | 96 |  | 170081.747 | 0.015 |
| 39 | 44 |  | 78952.077 | 0.015 |
| 40 | 46 |  | 82461.258 | -0.006 |
| 41 | 48 |  | 85970.431 | 0.004 |
| 42 | 50 |  | 89479.536 | -0.004 |
| 43 | 51 |  | 91234.069 | -0.006 |
| 44 | 52 |  | 92988.598 | 0.004 |
| 45 | 53 |  | 94743.088 | -0.008 |
|  |  |  |  |  |

**Table S8 *continued***

(000101) state

|  |  |  |  |  |
| --- | --- | --- | --- | --- |
| no. | J | *k* | observed frequency | obs.  calc |
|  |  |  |  |  |
|  |  |  |  |  |
| 46 | 54 |  | 96497.583 | 0.003 |
| 47 | 57 |  | 101760.911 | -0.006 |
| 48 | 60 |  | 107024.055 | -0.010 |
| 49 | 62 |  | 110532.724 | 0.007 |
| 50 | 65 |  | 115795.521 | 0.009 |
| 51 | 73 |  | 129828.515 | 0.018 |
| 52 | 75 |  | 133336.470 | 0.000 |
| 53 | 77 |  | 136844.325 | -0.006 |
| 54 | 82 |  | 145613.464 | -0.012 |
| 55 | 84 |  | 149120.921 | -0.006 |
| 56 | 93 |  | 164902.932 | 0.006 |
| 57 | 44 |  | 78950.320 | 0.003 |
| 58 | 46 |  | 82460.218 | -0.004 |
| 59 | 48 |  | 85970.133 | -0.006 |
| 60 | 50 |  | 89480.037 | -0.010 |
| 61 | 51 |  | 91235.006 | 0.014 |
| 62 | 52 |  | 92989.927 | 0.000 |
| 63 | 53 |  | 94744.839 | -0.011 |
| 64 | 54 |  | 96499.757 | -0.003 |
| 65 | 57 |  | 101764.391 | 0.005 |
| 66 | 60 |  | 107028.814 | -0.009 |
| 67 | 62 |  | 110538.337 | 0.013 |
| 68 | 73 |  | 129838.503 | 0.002 |
| 69 | 75 |  | 133347.221 | 0.006 |
| 70 | 76 |  | 135101.525 | 0.002 |
| 71 | 82 |  | 145626.691 | 0.009 |
| 72 | 84 |  | 149134.810 | 0.008 |
| 73 | 93 |  | 164919.646 | -0.030 |
| 74 | 96 |  | 170180.695 | 0.010 |
|  |  |  |  |  |

**Table S9:** Experimental frequencies and least-squares residuals (MHz) for the vibrational state (000002) of HC5P.

|  |  |  |  |  |
| --- | --- | --- | --- | --- |
| no. | J | *l*11 | observed frequency | obs.  calc |
|  |  |  |  |  |
|  |  |  |  |  |
| 1 | 44 |  | 78992.588 | 0.010 |
| 2 | 48 |  | 86011.728 | -0.002 |
| 3 | 49 |  | 87766.422 | -0.005 |
| 4 | 50 |  | 89521.086 | 0.001 |
| 5 | 54 |  | 96539.340 | 0.007 |
| 6 | 57 |  | 101802.597 | 0.002 |
| 7 | 60 |  | 107065.492 | 0.011 |
| 8 | 62 |  | 110573.860 | 0.003 |
| 9 | 65 |  | 115836.095 | 0.004 |
| 10 | 73 |  | 129866.726 | -0.006 |
| 11 | 76 |  | 135127.454 | -0.011 |
| 12 | 84 |  | 149154.054 | 0.003 |
| 13 | 98 |  | 173693.567 | -0.009 |
| 14 | 44 |  | 78999.230 | 0.009 |
| 15 | 48 |  | 86020.351 | -0.005 |
| 16 | 49 |  | 87775.595 | -0.005 |
| 17 | 50 |  | 89530.817 | -0.011 |
| 18 | 54 |  | 96551.570 | 0.005 |
| 19 | 57 |  | 101816.924 | -0.003 |
| 20 | 60 |  | 107082.105 | -0.012 |
| 21 | 62 |  | 110592.138 | -0.005 |
| 22 | 65 |  | 115857.014 | -0.010 |
| 23 | 73 |  | 129895.723 | 0.003 |
| 24 | 76 |  | 135159.843 | 0.008 |
| 25 | 98 |  | 173755.758 | 0.007 |
| 26 | 105 |  | 186033.114 | 0.008 |
| 27 | 44 |  | 79006.297 | 0.007 |
| 28 | 48 |  | 86029.450 | 0.004 |
| 29 | 49 |  | 87785.258 | 0.011 |
| 30 | 50 |  | 89541.067 | 0.015 |
| 31 | 54 |  | 96564.315 | -0.002 |
| 32 | 57 |  | 101831.809 | 0.001 |
| 33 | 60 |  | 107099.336 | 0.006 |
| 34 | 62 |  | 110611.024 | 0.000 |
| 35 | 65 |  | 115878.579 | -0.002 |
| 36 | 73 |  | 129925.383 | -0.025 |
| 37 | 76 |  | 135192.945 | 0.011 |
| 38 | 84 |  | 149239.397 | -0.014 |
| 39 | 98 |  | 173818.853 | -0.009 |
| 40 | 105 |  | 186107.094 | 0.011 |
|  |  |  |  |  |

**Table S10:** Experimental frequencies and least-squares residuals (MHz) for the vibrational state (000003) of HC5P.

|  |  |  |  |  |
| --- | --- | --- | --- | --- |
| no. | J | *l*11 | observed frequency | obs.  calc |
|  |  |  |  |  |
|  |  |  |  |  |
| 1 | 44 |  | 79093.074 | 0.011 |
| 2 | 48 |  | 86122.037 | 0.005 |
| 3 | 51 |  | 91393.515 | 0.001 |
| 4 | 54 |  | 96664.769 | -0.003 |
| 5 | 57 |  | 101935.790 | -0.007 |
| 6 | 60 |  | 107206.591 | 0.014 |
| 7 | 62 |  | 110720.289 | -0.002 |
| 8 | 65 |  | 115990.642 | -0.001 |
| 9 | 73 |  | 130043.565 | -0.006 |
| 10 | 76 |  | 135312.884 | -0.005 |
| 11 | 84 |  | 149362.902 | -0.006 |
| 12 | 98 |  | 173944.843 | 0.003 |
| 13 | 105 |  | 186232.950 | 0.002 |
| 14 | 44 |  | 79150.989 | -0.007 |
| 15 | 48 |  | 86186.068 | 0.007 |
| 16 | 51 |  | 91462.258 | 0.002 |
| 17 | 54 |  | 96738.355 | 0.002 |
| 18 | 57 |  | 102014.349 | 0.004 |
| 19 | 60 |  | 107290.223 | 0.000 |
| 20 | 62 |  | 110807.398 | -0.010 |
| 21 | 65 |  | 116083.067 | -0.011 |
| 22 | 73 |  | 130150.836 | 0.001 |
| 23 | 76 |  | 135425.960 | 0.005 |
| 24 | 84 |  | 149492.054 | -0.016 |
| 25 | 98 |  | 174104.217 | 0.023 |
| 26 | 105 |  | 186408.250 | 0.004 |
| 27 | 44 |  | 79151.280 | 0.012 |
| 28 | 48 |  | 86186.486 | 0.008 |
| 29 | 51 |  | 91462.822 | 0.006 |
| 30 | 54 |  | 96739.104 | 0.010 |
| 31 | 57 |  | 102015.315 | 0.006 |
| 32 | 60 |  | 107291.458 | -0.003 |
| 33 | 62 |  | 110808.850 | -0.010 |
| 34 | 65 |  | 116084.899 | -0.007 |
| 35 | 73 |  | 130154.047 | 0.000 |
| 36 | 76 |  | 135429.855 | -0.004 |
| 37 | 84 |  | 149498.370 | -0.020 |
| 38 | 98 |  | 174117.321 | 0.000 |
| 39 | 105 |  | 186426.329 | 0.003 |
| 40 | 44 |  | 79200.100 | -0.006 |
| 41 | 48 |  | 86238.426 | 0.012 |
|  |  |  |  |  |

**Table S10 *continued***

|  |  |  |  |  |
| --- | --- | --- | --- | --- |
| no. | J | *l*11 | observed frequency | obs.  calc |
|  |  |  |  |  |
|  |  |  |  |  |
| 42 | 51 |  | 91516.859 | 0.004 |
| 43 | 54 |  | 96795.033 | 0.006 |
| 44 | 57 |  | 102072.906 | -0.008 |
| 45 | 60 |  | 107350.509 | 0.013 |
| 46 | 62 |  | 110868.715 | 0.009 |
| 47 | 65 |  | 116145.749 | 0.008 |
| 48 | 73 |  | 130216.042 | -0.011 |
| 49 | 76 |  | 135491.675 | -0.021 |
| 50 | 84 |  | 149557.944 | -0.001 |
| 51 | 98 |  | 174165.451 | -0.004 |
| 52 | 105 |  | 186464.677 | 0.005 |
|  |  |  |  |  |

**Table S11:** Experimental frequencies and least-squares residuals (MHz) for the vibrational state (000011) of HC5P.

|  |  |  |  |  |
| --- | --- | --- | --- | --- |
| no. | J | *k* | observed frequency | obs.  calc |
|  |  |  |  |  |
|  |  |  |  |  |
| 1 | 44 |  | 78973.707 | -0.008 |
| 2 | 48 |  | 85991.652 | -0.005 |
| 3 | 49 |  | 87746.082 | 0.014 |
| 4 | 50 |  | 89500.459 | 0.010 |
| 5 | 54 |  | 96517.655 | -0.001 |
| 6 | 57 |  | 101780.212 | -0.005 |
| 7 | 60 |  | 107042.464 | -0.006 |
| 8 | 62 |  | 110550.456 | -0.006 |
| 9 | 65 |  | 115812.206 | 0.027 |
| 10 | 73 |  | 129841.791 | 0.013 |
| 11 | 76 |  | 135102.235 | -0.009 |
| 12 | 84 |  | 149128.402 | -0.019 |
| 13 | 98 |  | 173668.127 | 0.002 |
| 14 | 105 |  | 185935.079 | -0.005 |
| 15 | 44 |  | 78975.853 | -0.007 |
| 16 | 48 |  | 85994.380 | -0.013 |
| 17 | 49 |  | 87748.997 | 0.029 |
| 18 | 50 |  | 89503.524 | 0.005 |
| 19 | 54 |  | 96521.463 | -0.012 |
| 20 | 57 |  | 101784.660 | -0.014 |
| 21 | 60 |  | 107047.624 | -0.009 |
| 22 | 62 |  | 110556.125 | -0.011 |
| 23 | 65 |  | 115818.676 | -0.005 |
| 24 | 73 |  | 129850.894 | 0.024 |
| 25 | 76 |  | 135112.465 | 0.010 |
| 26 | 98 |  | 173688.963 | -0.005 |
| 27 | 106 |  | 187712.967 | 0.003 |
| 28 | 44 |  | 78981.668 | -0.003 |
| 29 | 48 |  | 86001.832 | 0.002 |
| 30 | 49 |  | 87756.854 | 0.004 |
| 31 | 50 |  | 89511.876 | 0.013 |
| 32 | 54 |  | 96531.832 | 0.007 |
| 33 | 57 |  | 101796.697 | 0.001 |
| 34 | 60 |  | 107061.496 | 0.026 |
| 35 | 62 |  | 110571.271 | 0.011 |
| 36 | 65 |  | 115835.855 | 0.006 |
| 37 | 73 |  | 129874.090 | -0.009 |
| 38 | 76 |  | 135138.146 | -0.015 |
| 39 | 84 |  | 149174.749 | -0.010 |
| 40 | 98 |  | 173734.952 | -0.006 |
|  |  |  |  |  |

**Table S11 *continued***

|  |  |  |  |  |
| --- | --- | --- | --- | --- |
| no. | J | *k* | observed frequency | obs.  calc |
|  |  |  |  |  |
|  |  |  |  |  |
| 41 | 105 |  | 186012.853 | 0.008 |
| 42 | 44 |  | 78983.624 | -0.016 |
| 43 | 48 |  | 86004.381 | 0.006 |
| 44 | 49 |  | 87759.545 | -0.010 |
| 45 | 50 |  | 89514.739 | 0.005 |
| 46 | 54 |  | 96535.429 | -0.001 |
| 47 | 57 |  | 101800.922 | -0.005 |
| 48 | 60 |  | 107066.404 | 0.009 |
| 49 | 62 |  | 110576.694 | 0.005 |
| 50 | 65 |  | 115842.089 | -0.005 |
| 51 | 73 |  | 129882.886 | -0.017 |
| 52 | 76 |  | 135148.061 | -0.011 |
| 53 | 84 |  | 149188.021 | -0.003 |
| 54 | 98 |  | 173755.398 | -0.017 |
| 55 | 105 |  | 186037.456 | 0.027 |
|  |  |  |  |  |

**Table S12:** Experimental frequencies and least-squares residuals (MHz) for the vibrational state (001001) of HC5P.

|  |  |  |  |  |
| --- | --- | --- | --- | --- |
| no. | J | *k* | observed frequency | obs.  calc |
|  |  |  |  |  |
|  |  |  |  |  |
| 1 | 44 |  | 78931.514 | 0.007 |
| 2 | 46 |  | 82438.046 | 0.016 |
| 3 | 48 |  | 85944.425 | 0.011 |
| 4 | 50 |  | 89450.657 | -0.011 |
| 5 | 51 |  | 91203.754 | 0.006 |
| 6 | 52 |  | 92956.799 | 0.000 |
| 7 | 53 |  | 94709.815 | -0.005 |
| 8 | 54 |  | 96462.813 | 0.000 |
| 9 | 60 |  | 106980.230 | 0.000 |
| 10 | 62 |  | 110485.846 | -0.002 |
| 11 | 65 |  | 115744.102 | -0.014 |
| 12 | 71 |  | 126260.110 | -0.013 |
| 13 | 75 |  | 133270.408 | -0.010 |
| 14 | 77 |  | 136775.452 | -0.001 |
| 15 | 82 |  | 145537.678 | -0.023 |
| 16 | 84 |  | 149042.488 | 0.029 |
| 17 | 93 |  | 164812.804 | 0.016 |
| 18 | 96 |  | 170069.131 | -0.006 |
| 19 | 44 |  | 78935.369 | -0.009 |
| 20 | 46 |  | 82442.458 | -0.007 |
| 21 | 48 |  | 85949.442 | -0.018 |
| 22 | 50 |  | 89456.366 | -0.001 |
| 23 | 51 |  | 91209.793 | 0.005 |
| 24 | 52 |  | 92963.194 | 0.004 |
| 25 | 53 |  | 94716.563 | -0.008 |
| 26 | 54 |  | 96469.939 | 0.006 |
| 27 | 57 |  | 101729.921 | 0.014 |
| 28 | 60 |  | 106989.726 | 0.009 |
| 29 | 62 |  | 110496.185 | 0.015 |
| 30 | 65 |  | 115755.719 | 0.002 |
| 31 | 71 |  | 126274.323 | -0.007 |
| 32 | 75 |  | 133286.374 | 0.010 |
| 33 | 77 |  | 136792.269 | 0.008 |
| 34 | 82 |  | 145556.620 | -0.015 |
| 35 | 84 |  | 149062.235 | 0.007 |
| 36 | 93 |  | 164836.184 | -0.004 |
| 37 | 96 |  | 170093.690 | -0.011 |
| 38 | 44 |  | 78956.219 | 0.018 |
| 39 | 46 |  | 82465.606 | 0.009 |
| 40 | 50 |  | 89484.314 | 0.015 |
|  |  |  |  |  |

**Table S12 *continued***

|  |  |  |  |  |
| --- | --- | --- | --- | --- |
| no. | J | *k* | observed frequency | obs.  calc |
|  |  |  |  |  |
|  |  |  |  |  |
| 41 | 51 |  | 91238.935 | -0.013 |
| 42 | 52 |  | 92993.578 | -0.006 |
| 43 | 53 |  | 94748.200 | -0.006 |
| 44 | 54 |  | 96502.824 | 0.010 |
| 45 | 57 |  | 101766.531 | -0.004 |
| 46 | 60 |  | 107030.089 | 0.003 |
| 47 | 62 |  | 110539.035 | 0.020 |
| 48 | 71 |  | 126327.996 | -0.010 |
| 49 | 75 |  | 133344.632 | -0.018 |
| 50 | 77 |  | 136852.785 | -0.018 |
| 51 | 84 |  | 149130.409 | -0.002 |
| 52 | 93 |  | 164913.688 | 0.004 |
| 53 | 96 |  | 170174.206 | 0.015 |
| 54 | 44 |  | 78960.258 | -0.005 |
| 55 | 46 |  | 82470.234 | 0.001 |
| 56 | 48 |  | 85980.211 | -0.009 |
| 57 | 50 |  | 89490.203 | -0.011 |
| 58 | 51 |  | 91245.203 | -0.006 |
| 59 | 52 |  | 93000.197 | -0.003 |
| 60 | 53 |  | 94755.170 | -0.017 |
| 61 | 54 |  | 96510.180 | 0.012 |
| 62 | 57 |  | 101775.062 | 0.006 |
| 63 | 60 |  | 107039.850 | 0.017 |
| 64 | 62 |  | 110549.614 | 0.009 |
| 65 | 65 |  | 115814.126 | 0.009 |
| 66 | 71 |  | 126342.506 | -0.012 |
| 67 | 75 |  | 133360.929 | 0.011 |
| 68 | 77 |  | 136869.933 | -0.009 |
| 69 | 82 |  | 145641.955 | -0.005 |
| 70 | 84 |  | 149150.530 | -0.011 |
| 71 | 93 |  | 164937.482 | -0.001 |
| 72 | 96 |  | 170199.177 | 0.010 |
|  |  |  |  |  |
